# Supplementary material for: Evolutionary selected Tibetan variants of HIF pathway and risk of lung cancer
Source: PubMed Central journal article supplement (PMC5355300; doi:10.18632/oncotarget.14340), 2016-12-28
Supplement: oncotarget-08-11739-s001.pdf [file oncotarget-08-11739-s001.pdf]

## Evolutionary selected Tibetan variants of HIF pathway and risk of lung cancer

### SUPPLEMENTARY TABLE

Supplementary Table S1: Amplification and SNE primers *EPAS1/HIF-2 $\alpha$*  region of Chromosome 2

| Target      | Forward Primer         | Reverse primer          | SNE primer                                                              |
|-------------|------------------------|-------------------------|-------------------------------------------------------------------------|
| rs113305133 | TATGCAAGGTTAGTGAAAGCCC | CATGCTATTCCAAGGTTTCCCC  | T(7)GCCCCTT<br>ACCTTCACCCC                                              |
| rs149306391 | GAGTATTCGCCTAGGAAGAGCA | TCACTGTTCCCCTTTCACAGAT  | AGATTGTTATTGT<br>CATTGTTCTTCT<br>TTCACAGATCTG<br>GAAACAGACACTT          |
| rs188801636 | AAAGGCCTTATCCTCTAGCCTG | ACATCATTTCTCCAGAAGCCTA  | TACATCATTTCTCCA<br>GAAGCCTATA<br>TTTAATATAA                             |
| rs61151542  | TCCCGTTAATTACAGAGCTGGT | AACTCAGATTTCAAGTGCCTTCG | T(14)CCTTGTGTTT<br>TCCTCAAATACTACAT                                     |
| rs77111769  | TTTGACCTCCCCATTTCCAAC  | CAGTTCTGGGCTGTATTATGCC  | T(23)CCCTTCTTAG<br>GCAAACATAATGG                                        |
| rs373417600 | AGGATGAAAACGCTCATCCTTG | ACTCTGTCTCTCCTGTTAAGCC  | ATAAGGTTTAGT<br>TTGTTCCCCACTTACG<br>TAAGTCTTTTAATAAT<br>GTGCCTTGAAAACCT |
| rs150877473 | GAGTCCCAGGTGTAGGGTAAC  | GGGCAGTTGTTGTAGACTTTCA  | CGGCTCCATGTCT<br>GACCCTT<br>CCACGCCTGT                                  |
| rs142764723 | AGAAAGCTTGACAGGGGAACT  | GTTTTTCCTGTGCTGTTCTTGC  | GAATCATGGG<br>CTTGGGTTTTTCTG<br>TTTTGTTCTTGCGC<br>TAGTGAATAAGTCTCA      |
| rs117813469 | AACCTGGACTCAGGAAGATCAG | CACATCTCTTCCATCCATCGC   | TGTCCTGGCCCTCGCT                                                        |
| rs13005507  | GTTGGGCCAGAGTTGATCT    | AGATGGAGGGGATGCTTTGATT  | TGTTGATCTG<br>CTGACCCACTT                                               |
